# Supplementary material for: F-18 labelled PSMA-1007: biodistribution, radiation dosimetry and histopathological validation of tumor lesions in prostate cancer patients
Source: Springer Nature journal article supplement (doi:10.1007/s00259-016-3573-4), 2016-11-26
Supplement: MOESM1 [file 11096434]

## Effective Half Lives

| Organ                   | Subject-1 |          | Subject-2 |          | Subject-3 |          |
|-------------------------|-----------|----------|-----------|----------|-----------|----------|
|                         | Eff1      | Eff2     | Eff1      | Eff2     | Eff1      | Eff2     |
| Heart Content           | 2.21E-01  | 9.81E-01 | 8.40E-02  | 5.68E-01 | 2.01E-01  | 8.54E-01 |
| Heart Wall              | NA        | NA       | NA        | NA       | NA        | NA       |
| Kidneys                 | 2.17E+00  | 4.78E-01 | 5.82E-01  | 1.85E+00 | 1.89E+00  | 5.66E-01 |
| LKidney                 | 2.17E+00  | 5.15E-01 | 5.94E-01  | 1.85E+00 | 1.88E+00  | 5.94E-01 |
| LLI Content             | 1.67E+00  | 6.41E-01 | 1.31E-01  | 2.13E+00 | 1.77E+00  | 2.35E-01 |
| LParotidGland           | 8.89E-01  | 1.59E+00 | 1.68E+00  | 8.35E-01 | 7.03E-01  | 1.71E+00 |
| LSubmandibularGland     | 1.63E+00  | 8.47E-01 | 1.70E+00  | 4.85E-01 | 3.40E-01  | 2.16E+00 |
| Liver                   | 2.06E+00  | NA       | 1.78E+00  | 6.72E-01 | 1.86E+00  | 7.89E-01 |
| Prostate                | 6.30E-01  | 2.15E+00 | 7.22E-01  | 2.00E+00 | 4.52E-01  | 2.31E+00 |
| RKidney                 | 2.16E+00  | 4.44E-01 | 5.70E-01  | 1.86E+00 | 5.43E-01  | 1.88E+00 |
| RParotidGland           | 1.75E+00  | 9.47E-01 | 5.98E-01  | 1.82E+00 | 2.07E+00  | 4.94E-01 |
| RSubmandibularGland     | 1.23E+00  | 1.23E+00 | 8.56E-01  | 1.56E+00 | 8.65E-01  | 1.60E+00 |
| Red Marrow              | 2.22E-01  | 9.87E-01 | 8.38E-02  | 5.68E-01 | 2.01E-01  | 8.54E-01 |
| Spleen                  | 1.91E+00  | NA       | 5.11E-01  | 1.86E+00 | 9.15E-01  | 1.88E+00 |
| Total Body              | NA        | NA       | NA        | NA       | NA        | NA       |
| ULI Content             | 2.00E+00  | 8.02E-01 | 1.29E+00  | 1.29E+00 | 2.42E+00  | NA       |
| Urinary Bladder Content | 1.52E+00  | NA       | 1.79E+00  | NA       | 2.49E+00  | NA       |
| Whole Heart             | 2.54E-01  | 1.21E+00 | 2.66E-01  | 1.21E+00 | 2.90E-01  | 1.18E+00 |

## Residence Times

| Organ               | Residence Time,<br>Subject1<br>[MBq*h/MBq] | Residence Time,<br>Subject2<br>[MBq*h/MBq] | Residence Time,<br>Subject3<br>[MBq*h/MBq] |
|---------------------|--------------------------------------------|--------------------------------------------|--------------------------------------------|
| Heart Content       | 3.94E-02                                   | 3.78E-02                                   | 3.38E-02                                   |
| Heart Wall          | 1.83E-02                                   | 1.69E-02                                   | 1.52E-02                                   |
| Kidneys             | 3.22E-01                                   | 2.38E-01                                   | 2.32E-01                                   |
| LKidney             | 1.75E-01                                   | 1.21E-01                                   | 1.14E-01                                   |
| LLI Content         | 5.36E-02                                   | 6.68E-02                                   | 7.27E-02                                   |
| LParotidGland       | 1.09E-02                                   | 1.63E-02                                   | 1.14E-02                                   |
| LSubmandibularGland | 6.44E-03                                   | 5.94E-03                                   | 6.04E-03                                   |
| Liver               | 4.39E-01                                   | 4.49E-01                                   | 4.39E-01                                   |
| Prostate            | 4.82E-03                                   | 5.34E-03                                   | 4.28E-03                                   |
| RKidney             | 1.47E-01                                   | 1.17E-01                                   | 1.18E-01                                   |
| RParotidGland       | 1.18E-02                                   | 2.00E-02                                   | 1.20E-02                                   |
| RSubmandibularGland | 5.81E-03                                   | 6.13E-03                                   | 5.49E-03                                   |
| Red Marrow          | 4.26E-02                                   | 4.07E-02                                   | 3.64E-02                                   |
| Spleen              | 3.59E-02                                   | 5.95E-02                                   | 9.33E-02                                   |
| Total Body          | 2.64E+00                                   | 2.64E+00                                   | 2.64E+00                                   |
| ULI Content         | 6.74E-02                                   | 6.76E-02                                   | 8.25E-02                                   |
| Urinary Bladder     | 1.39E-02                                   | 2.45E-02                                   | 1.67E-02                                   |
| Whole Heart         | 5.77E-02                                   | 5.47E-02                                   | 4.90E-02                                   |

**IDAC Dose Calculation (Safety Dosimetry – Phantom: Adult)**

| <b>Organ</b>          | <b>NormalisedDose<br/>Subject-1<br/>[mGy/MBq]</b> | <b>NormalisedDose<br/>Subject-2<br/>[mGy/MBq]</b> | <b>NormalisedDose<br/>Subject-3<br/>[mGy/MBq]</b> |
|-----------------------|---------------------------------------------------|---------------------------------------------------|---------------------------------------------------|
| Adrenals              | 1,88E-02                                          | 1,83E-02                                          | 1,81E-02                                          |
| Bladder               | 1,37E-02                                          | 1,57E-02                                          | 1,94E-02                                          |
| Bone surfaces         | 9,66E-03                                          | 9,88E-03                                          | 9,99E-03                                          |
| Brain                 | 5,69E-03                                          | 6,16E-03                                          | 6,14E-03                                          |
| Breast                | 6,79E-03                                          | 7,18E-03                                          | 7,18E-03                                          |
| Gall bladder          | 2,12E-02                                          | 2,13E-02                                          | 2,12E-02                                          |
| Stomach               | 1,23E-02                                          | 1,35E-02                                          | 1,28E-02                                          |
| Small intestine       | 1,37E-02                                          | 1,48E-02                                          | 1,42E-02                                          |
| Upper large intestine | 3,70E-02                                          | 4,33E-02                                          | 3,73E-02                                          |
| Lower large intestine | 3,98E-02                                          | 5,20E-02                                          | 4,84E-02                                          |
| Heart                 | 2,51E-02                                          | 2,21E-02                                          | 2,40E-02                                          |
| Kidneys               | 2,10E-01                                          | 1,55E-01                                          | 1,58E-01                                          |
| Liver                 | 6,14E-02                                          | 6,11E-02                                          | 6,23E-02                                          |
| Lungs                 | 9,65E-03                                          | 1,01E-02                                          | 1,01E-02                                          |
| Muscles               | 8,50E-03                                          | 9,01E-03                                          | 8,92E-03                                          |
| Oesophagus            | 8,39E-03                                          | 8,72E-03                                          | 8,81E-03                                          |
| Ovaries               | 1,20E-02                                          | 1,34E-02                                          | 1,30E-02                                          |
| Pancreas              | 1,74E-02                                          | 1,88E-02                                          | 1,78E-02                                          |
| Red marrow            | 1,17E-02                                          | 1,16E-02                                          | 1,18E-02                                          |
| Skin                  | 6,08E-03                                          | 6,47E-03                                          | 6,43E-03                                          |
| Spleen                | 4,81E-02                                          | 1,07E-01                                          | 7,17E-02                                          |
| Testes                | 6,64E-03                                          | 7,26E-03                                          | 7,28E-03                                          |
| Thymus                | 8,39E-03                                          | 8,72E-03                                          | 8,81E-03                                          |
| Thyroid               | 6,76E-03                                          | 7,29E-03                                          | 7,27E-03                                          |
| Remaining organs      | 8,83E-03                                          | 9,71E-03                                          | 9,39E-03                                          |
| ED ICRP 60            | 2,15E-02                                          | 2,18E-02                                          | 2,14E-02                                          |
